# Supplementary material for: The Clock Genes Period 2 and Cryptochrome 2 Differentially Balance Bone Formation
Source: PubMed Central journal article supplement (PMC2902506; doi:10.1371/journal.pone.0011527), 2010-07-12

Figure S1

# Cosinor analysis

| Osteocalcin | wildtype | Per <sup>Brdm1</sup> | Cry2 <sup>-/-</sup> | Per <sup>Brdm1</sup> /Cry2 <sup>-/-</sup> |
|-------------|----------|----------------------|---------------------|-------------------------------------------|
| MESOR       | 115      | 114.25               | 88                  | 97.25                                     |
| AMPLITUDE   | 20.099   | 27.536               | 13.152              | 13.124                                    |
| ACROPHASE   | 13.38    | 11.042               | 12.416              | 10.309                                    |
| p-VALUE     | 0.441    | 0.237                | 0.763               | 0.33                                      |

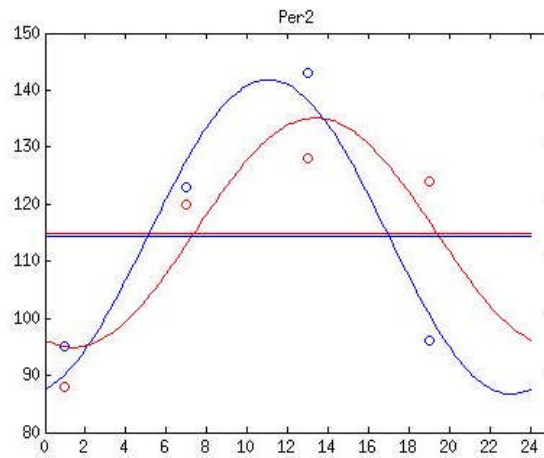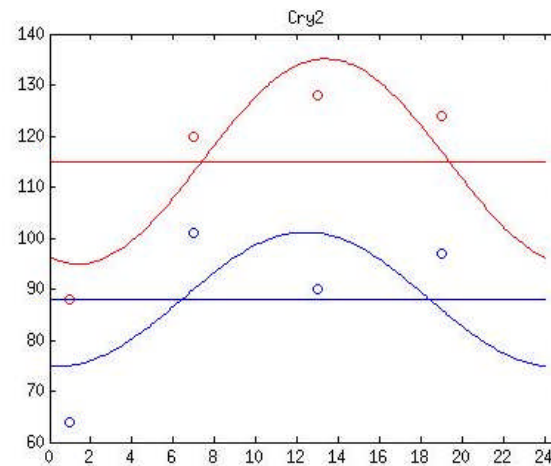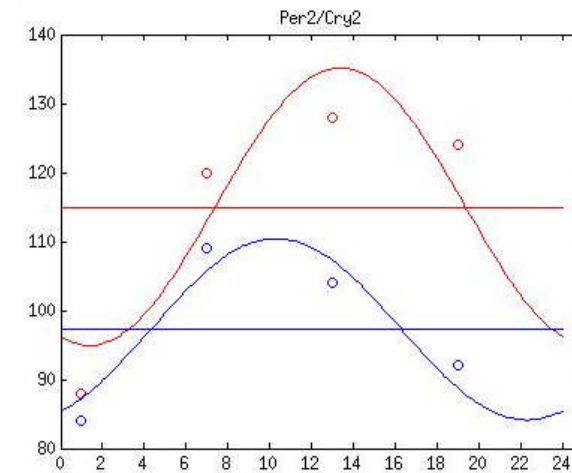

Supplement: pone.0011527.s001.pdf [file pone.0011527.s001.pdf]
