# Supplementary material for: The Clock Genes Period 2 and Cryptochrome 2 Differentially Balance Bone Formation
Source: PubMed Central journal article supplement (PMC2902506; doi:10.1371/journal.pone.0011527), 2010-07-12

Figure S2

Calvarial osteoblasts from mPer2-luc transgenic mice

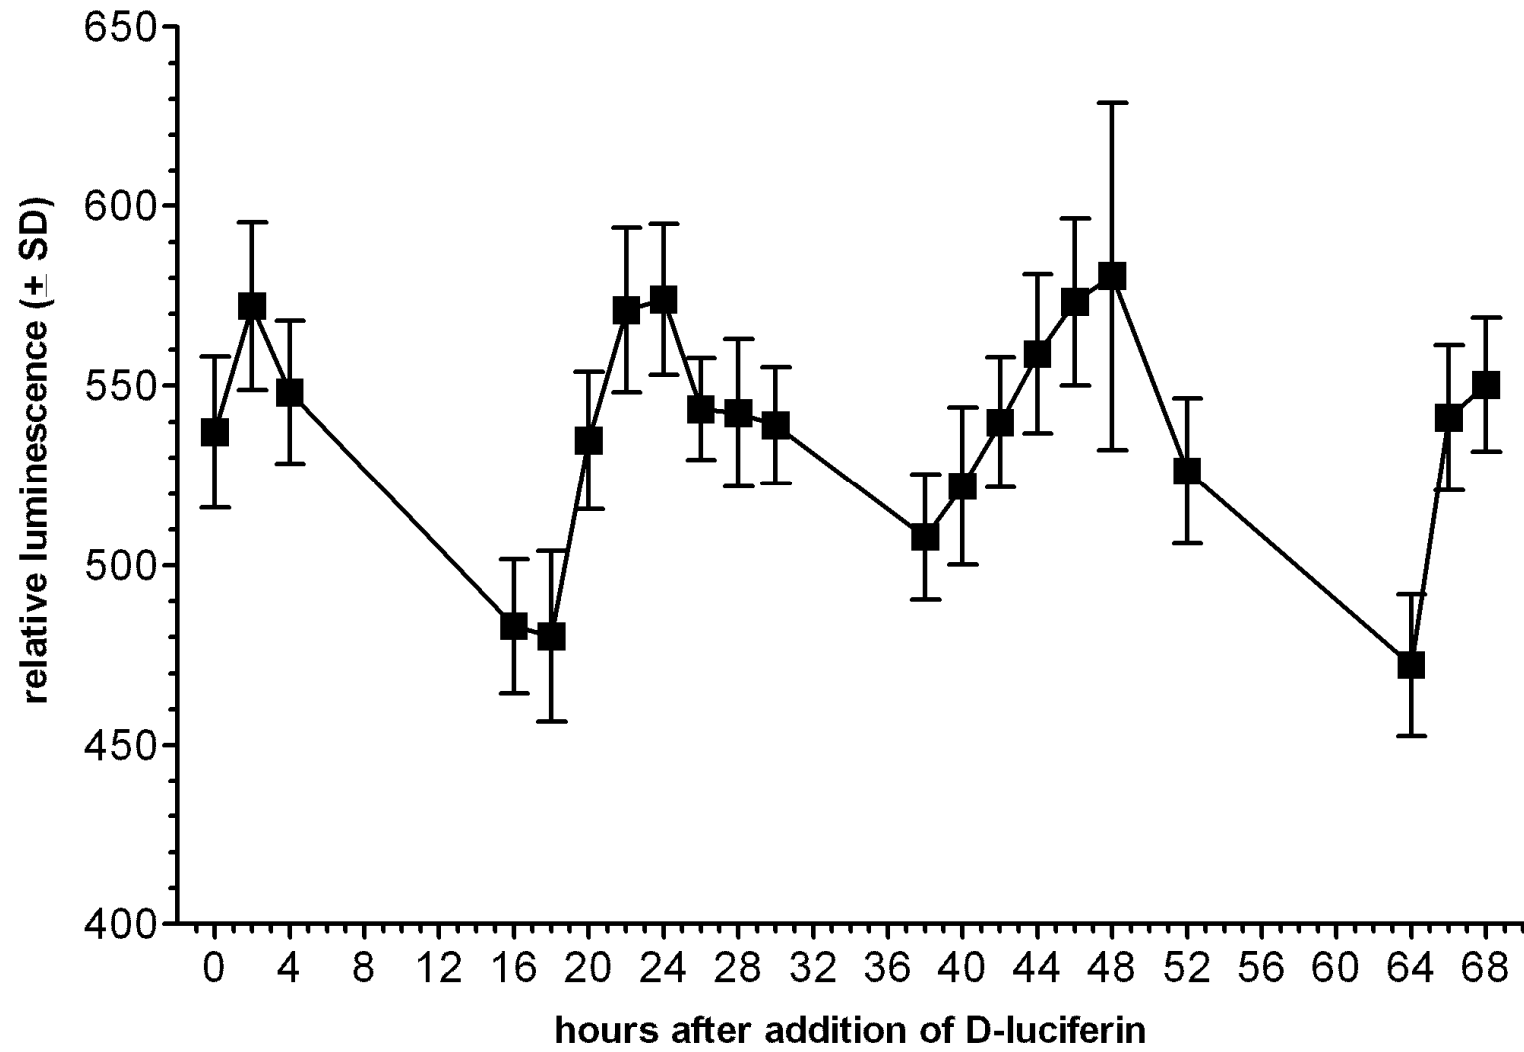

Supplement: pone.0011527.s002.pdf [file pone.0011527.s002.pdf]
